# Supplementary material
Source: PubMed Central journal article supplement (PMC8289531)
Supplement: 10-1055-s-0039-3399590-s190092.pdf [file 10-1055-s-0039-3399590-s190092.pdf]

### Supplemental digital content

**1A** Dissection equipment. List of instruments and micro-instruments for macroscopic–microscopic dissection that we routinely use in the laboratory. Catalog V. Mueller Vernon Hills, Illinois, United States.

- 1B** Vessel cannulation materials
- 1C** Latex injection materials
- 1D** Photography equipment
- 1E** 3D Projection equipment

### Specimen preparation equipment

Dissection equipment (Supplement 1A)\*

| Reference  | Item                                        |
|------------|---------------------------------------------|
| NL3785–030 | RHOTON MICRO SCISSORS STR OVER LGTH 7IN     |
| NL1090     | PENFIELD DISSECTOR #1 DBL-END 7–1/2IN       |
| NL1091     | PENFIELD DISSECTOR #2 ADBL-END 7–3/8IN      |
| NL1092     | PENFIELD DISSECTOR #3 ADBL-END 7–1/4IN      |
| NL1093     | PENFIELD DISSECTOR #4 SLIGHT CVD 8–1/2IN    |
| NL1094     | PENFIELD DISSECTOR #5 ADBL-END 11–1/2IN     |
| NL1310     | DAVIS BRAIN SPATULA DBL-END 10&13MM 8IN     |
| NL1415     | VITAL ADSON TISSUE FORCEP SERR TUNG-CARB    |
| NL1464     | VITAL CUSHING TISS FORCEP BAYON T/C TIP     |
| NL1570     | CUSHING TISS FORCEP BAYON SERR 1 × 2 TEETH  |
| NL1900     | FRAZIER SUCT TUBE 7FR WORK LGTH 3–7/8IN     |
| NL1900–9   | FRAZIER SUCTION TUBE 9FR WK LGTH 3–7/8      |
| NL1902     | FRAZIER SUCT TUBE 10FR WORK LGTH 3–7/8IN    |
| NL1903     | FRAZIER SUCT TUBE 12FR WORK LGTH 3–7/8IN    |
| NL630      | LEKSELL RONG FORCEP DBL-ACT 8 × 16MM 8–1/2  |
| NL630–001  | LEKSELL RONG FORCEP DBL-ACT 7 × 13MM 8–1/2  |
| NL950      | ADSON CERBELLUM RETR 4 × 4 PRONGS 7–1/2IN   |
| OS4000     | LANGENBECK PERIOSTEAL ELEVATOR 17MM WIDE    |
| RH1650-S   | SUPER CUT METZ DISSECT CVD SCISSOR 5–3/4    |
| SU1403–001 | SURGICAL KNIFE HANDLE #3 5IN W/METRIC       |
| SU1407     | SURGICAL KNIFE HANDLE #7 6–3/8IN            |
| SU16005    | VITAL CRILE-WOOD NDL HLDR 3600 TEETH 6IN    |
| SU1804     | VITAL MAYO DISSECTING SCISSORS STR 6–3/4    |
| SU1945     | METZ DISSECT SCISSOR DEL CVD-ON-FLAT 7IN    |
| SU2702     | HALSTED MOSQUITO FORCEPS 5IN CVD            |
| SU2735     | CRILE ARTERY FORCEPS 5–1/2IN CVD            |
| SU2760     | PEAN ARTERY FORCEPS 6–1/2IN CVD             |
| SU2910     | ROEDER TOWEL FORCEPS W/BALL STOP 5–1/2IN    |
| SU3110     | WEITLANER RETR 3 × 4 SHARP PRONGS 5–1/2IN   |
| SU3112     | WEITLANER RETR 3 × 4 SHARP PRONGS 6–1/2IN   |
| SU4054     | FORCEPS TISSUE ALLIS 4 × 5 TEETH 6IN        |
| 88–3875    | FREER SS ELEVATOR RND HNDL 6MM SHRP/BLNT    |
| NL3785–031 | RHOTON MICRO SCISSORS CVD OVER LGTH 7IN     |
| NL4000     | YASARGIL MICRO SCISSORS STR BLADE 11.5MM    |
| NL4001     | YASARGIL MICRO SCISSOR CVD UP BLADE 11MM    |
| OP0911–002 | CASTRO FIXATION FORCEPS 0.3MM 1 × 2 TTH STR |

(Continued)

| Reference  | Item                                       |
|------------|--------------------------------------------|
| OP0911–401 | CVD DRESSING FORCEPS W/SERR GENTLE CVD     |
| OP0911–402 | DRESSING FORCEPS W/SERR GENTLE CVD TIPS    |
| OP0917–851 | WESTCOTT TENOTOMY MED BLUNT CVD SCISSORS   |
| OP0917–852 | WESTCOTT TENOTOMY MED BLUNT STR SCISSORS   |
| OP3302     | CASTROVIEJO CORNEO FORCEPS 1 × 2 0.5MM TTH |
| L-0101     | KERR MIC-HDL 3MM 7IN(18CM) UP 90DEG        |
| L-0127     | KERR MIC-HDL 5MM 8IN(20CM) DOWN 90DEG      |
| NL6146     | LOVE-GRUENWALD PITUITARY FORCEPS 2 × 10MM  |
| NL6147     | LOVE-GRUENWALD PITUITARY FORCEP 2 × 10MM   |
| NL3785     | RHOTON MICRONEUROSURGICAL 19/SET           |

Note: list of instruments and microinstruments for macroscopic-microscopic dissection that we routinely use in the laboratory. Catalog V. Mueller Vernon Hills, Illinois, United States.

### Vessel cannulation materials (Supplement 1B)

| Material                                   | Reference                                                                                                                                                            |
|--------------------------------------------|----------------------------------------------------------------------------------------------------------------------------------------------------------------------|
| VA cannula                                 | Jet Tip Arterial Tube, 1/16" × 2" Probe Tip Curved, ART062–2-CPB Design & Mfg. Co. LLC, Bedford, United States, distributor Dodge Company, Billerica, United States. |
| CA cannula                                 | 4" Threaded Hub Carotid Tube, Medium 1/4," Instruments Design & Mfg. Co. LLC, Bedford, United States, distributor Dodge Company, Billerica, United States.           |
| IJV cannula                                | 4" Threaded Hub Carotid Tube, Large 5/16," Instruments Design & Mfg. Co. LLC, Bedford, United States, distributor Dodge Company, Billerica, United States.           |
| Luer-lock adapters for cannula             | Instruments Design & Mfg. Co. LLC United States, distributor Dodge Company, Billerica, United States.                                                                |
| Arterial fixation forceps with three holes | Instruments Design & Mfg. Co. LLC, Bedford, United States, distributor Dodge Company, Billerica, United States.                                                      |

Abbreviations: CA, carotid arteries; IJV, internal jugular veins; VA, vertebral arteries.

### Latex injection materials (Supplement 1C)

| Material                                                  | Reference                                                                                                                                                         |
|-----------------------------------------------------------|-------------------------------------------------------------------------------------------------------------------------------------------------------------------|
| Red latex for arteries                                    | Red latex injection medium, CAROLINA, Burlington, United States                                                                                                   |
| Blue latex for veins                                      | Blue latex injection medium, CAROLINA, Burlington, United States                                                                                                  |
| Red and blue dye to enhance latex color of red/blue latex | ChromaFlo, Ashtabula, United States 830–494 Cal-Tint II 16-Ounce Colorants Permanent Red ChromaFlo, Ashtabula, USA® 830–7216 Cal-Tint II 16-Ounce Colorants, Blue |

## Photography equipment (Supplement 1D)

| Material                              | Reference                                                          |
|---------------------------------------|--------------------------------------------------------------------|
| Photographic camera                   | Canon EOS 80D Canon Inc., Tokyo, Japan                             |
| Ring flash                            | Canon MR-14EX II Macro Ring Lite Flash, Canon Inc., Tokyo, Japan   |
| Ring adapter for macrolens            | Canon Macrolite Adapter 67 Canon Inc., Tokyo, Japan                |
| 100 mm macrolens                      | Canon EF 100mm f/2.8 Macro USM Fixed Lens Canon Inc., Tokyo, Japan |
| Three-way tripod head                 | Manfrotto MHXPRO-3W, Manfrotto, Cassola, Italy                     |
| Micrometric positioning sliding plate | Manfrotto 454, Manfrotto, Cassola, Italy                           |
| Canon RS-60E3 remote control          | Canon Inc. Tokyo, Japan                                            |

## 3D Projection equipment (Supplement 1E)

| Material                                                                 | Reference                                                                                                       |
|--------------------------------------------------------------------------|-----------------------------------------------------------------------------------------------------------------|
| Active 3D projector                                                      | Optoma X600 XGA 6000 Lumen, Optoma, Taipei, Taiwan                                                              |
| Active glasses for 3D projector                                          | DLP Link 3D Glasses, GooDee Ultra-Clear HD 144 Hz 3D Active Rechargeable Shutter Glasses, GooDee, United States |
| Handheld device to check 3D in any screen with a Powerpoint presentation | Pokescope Graphic Media Research, Cannon Falls, Minnesota, United States                                        |
